# Supplementary material for: Dynamic performance–Energy tradeoff consolidation with contention-aware resource provisioning in containerized clouds
Source: PLoS One. 2022 Jan 20;17(1):e0261856. doi: 10.1371/journal.pone.0261856 (PMC8775309; doi:10.1371/journal.pone.0261856)
Supplement: S3 Fig — (XLSX) [file pone.0261856.s003.xlsx]

## Sheet: Perfil_best
		BF_MaxCap_MinTask	MaxSLAv_MaxCap_MinTask	MaxSLAv_MinSLAv_MinTask	MinAW_MaxCap_MinTask	Rand	Rand_MaxCap_MinTask	RR	MinAW_MinTask_Prop	Rand_MinTask_Prop	WF_MinTask_Prop	FF_MinTask_Prio	MaxSLAv_MinTask_Prio	MinAW_MinTask_Prio	MinSLAv_MinTask_Prio
	1	0	0	0	0	0	0	0	0	0	0	0	0	0	0
	1.02	0.133333	0.2	0.0333333	0.1	0	0.233333	0	0.3	0.3	0.366667	0.3	0.3	0.333333	0.266667
	1.04	0.233333	0.3	0.0666667	0.233333	0	0.266667	0	0.433333	0.366667	0.433333	0.366667	0.433333	0.366667	0.333333
	1.06	0.266667	0.3	0.133333	0.333333	0	0.3	0	0.433333	0.366667	0.466667	0.433333	0.466667	0.4	0.333333
	1.08	0.366667	0.5	0.166667	0.433333	0	0.4	0	0.466667	0.366667	0.5	0.466667	0.466667	0.433333	0.466667
	1.1	0.5	0.6	0.2	0.466667	0	0.533333	0	0.5	0.433333	0.633333	0.6	0.533333	0.5	0.5
	1.12	0.566667	0.666667	0.5	0.6	0	0.6	0	0.566667	0.633333	0.666667	0.666667	0.533333	0.566667	0.566667
	1.14	0.633333	0.7	0.6	0.666667	0	0.633333	0	0.633333	0.733333	0.7	0.733333	0.566667	0.6	0.633333
	1.16	0.733333	0.766667	0.666667	0.766667	0	0.766667	0	0.666667	0.833333	0.733333	0.833333	0.733333	0.666667	0.7
	1.18	0.8	0.866667	0.7	0.866667	0	0.833333	0	0.766667	0.833333	0.8	0.866667	0.766667	0.733333	0.766667
	1.2	0.833333	0.9	0.8	0.9	0	0.833333	0	0.766667	0.833333	0.866667	0.866667	0.766667	0.8	0.8
	1.22	0.866667	0.933333	0.866667	0.966667	0	0.9	0	0.833333	0.866667	0.866667	0.933333	0.8	0.833333	0.9
	1.24	0.9	0.966667	0.9	1	0	0.966667	0	0.933333	0.9	0.933333	0.933333	0.933333	0.9	0.966667
	1.26	0.933333	1	0.9	1	0	1	0	0.966667	0.966667	0.966667	1	0.966667	0.9	0.966667
	1.28	0.933333	1	0.966667	1	0	1	0	0.966667	1	0.966667	1	0.966667	0.966667	1
	1.3	0.933333	1	1	1	0	1	0	1	1	1	1	1	1	1
	1.32	0.966667	1	1	1	0	1	0	1	1	1	1	1	1	1
	1.34	1	1	1	1	0	1	0.0333333	1	1	1	1	1	1	1
	1.36	1	1	1	1	0	1	0.1	1	1	1	1	1	1	1
	1.38	1	1	1	1	0	1	0.1	1	1	1	1	1	1	1
	1.4	1	1	1	1	0	1	0.1	1	1	1	1	1	1	1
	1.42	1	1	1	1	0	1	0.1	1	1	1	1	1	1	1
	1.44	1	1	1	1	0	1	0.1	1	1	1	1	1	1	1
	1.46	1	1	1	1	0	1	0.1	1	1	1	1	1	1	1
	1.46	1	1	1	1	0	1	0.1	1	1	1	1	1	1	1
	1.5	1	1	1	1	0.0333333	1	0.2	1	1	1	1	1	1	1
	1.6	1	1	1	1	0.133333	1	0.366667	1	1	1	1	1	1	1
	1.7	1	1	1	1	0.3	1	0.5	1	1	1	1	1	1	1
	1.8	1	1	1	1	0.533333	1	0.6	1	1	1	1	1	1	1
	1.9	1	1	1	1	0.666667	1	0.733333	1	1	1	1	1	1	1
	2	1	1	1	1	0.733333	1	0.866667	1	1	1	1	1	1	1
	2.1	1	1	1	1	0.833333	1	0.933333	1	1	1	1	1	1	1
	2.2	1	1	1	1	0.9	1	0.966667	1	1	1	1	1	1	1
	2.3	1	1	1	1	0.966667	1	1	1	1	1	1	1	1	1
	2.4	1	1	1	1	1	1	1	1	1	1	1	1	1	1

## Sheet: Perfil_all
		BF_MaxCap_MinSLAv	BF_MinCap_MinSLAv	BF_MinSLAv_MinSLAv	BF_MinTask_MinSLAv	BF_MaxCap_MinTask	BF_MinCap_MinTask	BF_MinSLAv_MinTask	FF_MaxCap_MinSLAv	FF_MinCap_MinSLAv	FF_MinSLAv_MinSLAv	FF_MinTask_MinSLAv	FF_MaxCap_MinTask	FF_MinCap_MinTask	FF_MinSLAv_MinTask	MaxSLAv_MaxCap_MinSLAv	MaxSLAv_MinCap_MinSLAv	MaxSLAv_MinSLAv_MinSLAv	MaxSLAv_MinTask_MinSLAv	MaxSLAv_MaxCap_MinTask	MaxSLAv_MinCap_MinTask	MaxSLAv_MinSLAv_MinTask	MinAW_MaxCap_MinSLAv	MinAW_MinCap_MinSLAv	MinAW_MinSLAv_MinSLAv	MinAW_MinTask_MinSLAv	MinAW_MaxCap_MinTask	MinAW_MinCap_MinTask	MinAW_MinSLAv_MinTask	MinSLAv_MaxCap_MinSLAv	MinSLAv_MinCap_MinSLAv	MinSLAv_MinSLAv_MinSLAv	MinSLAv_MinTask_MinSLAv	MinSLAv_MaxCap_MinTask	MinSLAv_MinCap_MinTask	MinSLAv_MinSLAv_MinTask	Rand	Rand_MaxCap_MinSLAv	Rand_MinCap_MinSLAv	Rand_MinSLAv_MinSLAv	Rand_MinTask_MinSLAv	Rand_MaxCap_MinTask	Rand_MinCap_MinTask	Rand_MinSLAv_MinTask	RR	WFit_MaxCap_MinSLAv	WFit_MinCap_MinSLAv	WFit_MinSLAv_MinSLAv	WFit_MinTask_MinSLAv
	1	0	0	0	0	0	0	0	0	0	0	0	0	0	0	0	0	0	0	0	0	0	0	0	0	0	0	0	0	0	0	0	0	0	0	0	0	0	0	0	0	0	0	0	0	0	0	0	0
	1.02	0.166667	0.0333333	0.133333	0.1	0.133333	0.0666667	0.1	0.1	0.0333333	0.1	0.0333333	0.0666667	0.0333333	0.1	0.2	0.0333333	0.0666667	0.1	0.2	0.0333333	0.0333333	0.0666667	0.0333333	0.0666667	0.0333333	0.1	0.0333333	0.1	0.166667	0.0666667	0.0333333	0.0666667	0.166667	0.0333333	0.1	0	0.133333	0.0333333	0.133333	0.1	0.233333	0.0333333	0.133333	0	0.0666667	0.0333333	0.0333333	0.0333333
	1.04	0.233333	0.166667	0.166667	0.233333	0.233333	0.166667	0.133333	0.233333	0.133333	0.1	0.1	0.2	0.133333	0.1	0.233333	0.166667	0.1	0.233333	0.3	0.166667	0.0666667	0.1	0.0666667	0.0666667	0.0666667	0.233333	0.0666667	0.166667	0.366667	0.166667	0.1	0.0666667	0.233333	0.166667	0.233333	0	0.166667	0.133333	0.2	0.133333	0.266667	0.133333	0.2	0	0.166667	0.0333333	0.1	0.0333333
	1.06	0.3	0.166667	0.166667	0.266667	0.266667	0.2	0.133333	0.266667	0.133333	0.2	0.133333	0.266667	0.133333	0.233333	0.233333	0.166667	0.166667	0.3	0.3	0.166667	0.133333	0.233333	0.1	0.166667	0.133333	0.333333	0.133333	0.233333	0.4	0.166667	0.2	0.1	0.3	0.266667	0.233333	0	0.233333	0.133333	0.233333	0.133333	0.3	0.166667	0.233333	0	0.266667	0.0666667	0.233333	0.0333333
	1.08	0.366667	0.166667	0.2	0.266667	0.366667	0.233333	0.233333	0.3	0.166667	0.233333	0.233333	0.4	0.166667	0.266667	0.4	0.233333	0.2	0.333333	0.5	0.233333	0.166667	0.366667	0.1	0.2	0.166667	0.433333	0.133333	0.233333	0.433333	0.2	0.233333	0.266667	0.433333	0.3	0.3	0	0.3	0.166667	0.233333	0.233333	0.4	0.166667	0.266667	0	0.3	0.133333	0.266667	0.2
	1.1	0.466667	0.166667	0.233333	0.3	0.5	0.266667	0.266667	0.366667	0.233333	0.266667	0.233333	0.466667	0.233333	0.333333	0.433333	0.266667	0.2	0.366667	0.6	0.3	0.2	0.466667	0.166667	0.2	0.233333	0.466667	0.233333	0.233333	0.466667	0.233333	0.3	0.3	0.533333	0.333333	0.3	0	0.4	0.2	0.233333	0.266667	0.533333	0.233333	0.333333	0	0.366667	0.166667	0.333333	0.233333
	1.12	0.566667	0.166667	0.3	0.366667	0.566667	0.266667	0.333333	0.466667	0.266667	0.433333	0.3	0.6	0.3	0.533333	0.5	0.3	0.366667	0.4	0.666667	0.333333	0.5	0.533333	0.166667	0.266667	0.266667	0.6	0.3	0.266667	0.5	0.333333	0.366667	0.4	0.633333	0.4	0.366667	0	0.433333	0.233333	0.333333	0.4	0.6	0.3	0.366667	0	0.4	0.233333	0.366667	0.3
	1.14	0.6	0.3	0.4	0.4	0.633333	0.4	0.433333	0.533333	0.366667	0.533333	0.366667	0.666667	0.4	0.6	0.533333	0.3	0.433333	0.466667	0.7	0.4	0.6	0.566667	0.2	0.3	0.266667	0.666667	0.333333	0.266667	0.566667	0.4	0.533333	0.466667	0.733333	0.433333	0.566667	0	0.5	0.266667	0.433333	0.466667	0.633333	0.333333	0.466667	0	0.5	0.233333	0.5	0.333333
	1.16	0.666667	0.3	0.466667	0.466667	0.733333	0.4	0.633333	0.566667	0.433333	0.6	0.466667	0.7	0.5	0.633333	0.566667	0.333333	0.5	0.466667	0.766667	0.466667	0.666667	0.633333	0.233333	0.4	0.366667	0.766667	0.366667	0.4	0.6	0.433333	0.566667	0.5	0.766667	0.433333	0.633333	0	0.533333	0.333333	0.466667	0.533333	0.766667	0.433333	0.533333	0	0.533333	0.266667	0.5	0.433333
	1.18	0.7	0.333333	0.5	0.5	0.8	0.533333	0.7	0.6	0.566667	0.6	0.533333	0.766667	0.666667	0.633333	0.7	0.4	0.5	0.566667	0.866667	0.566667	0.7	0.633333	0.233333	0.533333	0.5	0.866667	0.366667	0.5	0.666667	0.466667	0.633333	0.533333	0.833333	0.533333	0.666667	0	0.633333	0.4	0.5	0.566667	0.833333	0.466667	0.6	0	0.566667	0.466667	0.5	0.6
	1.2	0.7	0.4	0.533333	0.633333	0.833333	0.6	0.766667	0.633333	0.6	0.666667	0.633333	0.8	0.7	0.7	0.7	0.466667	0.566667	0.7	0.9	0.633333	0.8	0.733333	0.3	0.566667	0.533333	0.9	0.4	0.566667	0.666667	0.533333	0.633333	0.666667	0.833333	0.533333	0.7	0	0.633333	0.466667	0.5	0.6	0.833333	0.533333	0.6	0	0.633333	0.6	0.566667	0.6
	1.22	0.733333	0.433333	0.633333	0.7	0.866667	0.633333	0.8	0.7	0.633333	0.7	0.666667	0.933333	0.766667	0.733333	0.733333	0.5	0.633333	0.733333	0.933333	0.7	0.866667	0.766667	0.366667	0.633333	0.566667	0.966667	0.5	0.666667	0.7	0.566667	0.7	0.733333	0.833333	0.566667	0.733333	0	0.666667	0.5	0.566667	0.7	0.9	0.566667	0.666667	0	0.633333	0.633333	0.6	0.6
	1.24	0.766667	0.566667	0.7	0.766667	0.9	0.666667	0.866667	0.766667	0.633333	0.733333	0.7	0.933333	0.8	0.766667	0.733333	0.566667	0.766667	0.733333	0.966667	0.733333	0.9	0.833333	0.466667	0.633333	0.566667	1	0.633333	0.7	0.7	0.566667	0.7	0.733333	0.9	0.6	0.766667	0	0.766667	0.633333	0.633333	0.733333	0.966667	0.7	0.766667	0	0.7	0.7	0.633333	0.733333
	1.26	0.8	0.666667	0.733333	0.833333	0.933333	0.766667	0.9	0.866667	0.633333	0.733333	0.733333	0.966667	0.8	0.833333	0.766667	0.633333	0.766667	0.766667	1	0.766667	0.9	0.833333	0.566667	0.766667	0.733333	1	0.7	0.833333	0.766667	0.633333	0.733333	0.766667	0.933333	0.7	0.833333	0	0.8	0.666667	0.733333	0.8	1	0.733333	0.833333	0	0.766667	0.733333	0.666667	0.766667
	1.28	0.8	0.733333	0.733333	0.866667	0.933333	0.8	0.933333	0.866667	0.666667	0.8	0.766667	0.966667	0.866667	0.866667	0.766667	0.733333	0.833333	0.833333	1	0.833333	0.966667	0.833333	0.6	0.766667	0.833333	1	0.766667	0.866667	0.766667	0.666667	0.866667	0.833333	0.933333	0.8	0.866667	0	0.8	0.733333	0.8	0.866667	1	0.833333	0.866667	0	0.766667	0.766667	0.7	0.833333
	1.3	0.8	0.733333	0.766667	0.866667	0.933333	0.8	0.966667	0.9	0.7	0.833333	0.8	0.966667	0.866667	0.9	0.766667	0.766667	0.833333	0.866667	1	0.866667	1	0.866667	0.666667	0.766667	0.833333	1	0.766667	0.9	0.766667	0.7	0.866667	0.866667	0.933333	0.833333	0.9	0	0.8	0.733333	0.866667	0.866667	1	0.833333	0.866667	0	0.766667	0.8	0.733333	0.833333
	1.32	0.8	0.766667	0.8	0.866667	0.966667	0.866667	0.966667	0.9	0.7	0.866667	0.833333	0.966667	0.866667	0.966667	0.766667	0.8	0.833333	0.9	1	0.933333	1	0.866667	0.733333	0.8	0.9	1	0.833333	0.933333	0.766667	0.733333	0.9	0.9	0.966667	0.833333	0.933333	0	0.866667	0.733333	0.866667	0.866667	1	0.866667	0.9	0	0.833333	0.833333	0.8	0.866667
	1.34	0.833333	0.8	0.8	0.866667	1	0.933333	0.966667	0.933333	0.766667	0.866667	0.833333	0.966667	0.933333	0.966667	0.766667	0.8	0.866667	0.9	1	0.933333	1	0.866667	0.766667	0.8	0.9	1	0.866667	0.933333	0.766667	0.766667	0.9	0.9	0.966667	0.9	0.933333	0	0.866667	0.733333	0.866667	0.866667	1	0.866667	0.933333	0.0333333	0.833333	0.833333	0.833333	0.9
	1.36	0.866667	0.933333	0.8	0.9	1	0.966667	0.966667	0.933333	0.8	0.9	0.833333	0.966667	0.966667	0.966667	0.8	0.833333	0.866667	0.9	1	0.933333	1	0.866667	0.766667	0.866667	0.9	1	0.866667	0.966667	0.8	0.8	0.9	0.9	0.966667	0.966667	0.933333	0	0.866667	0.8	0.9	0.9	1	0.966667	0.966667	0.1	0.833333	0.866667	0.833333	0.9
	1.38	0.866667	0.933333	0.8	0.9	1	0.966667	0.966667	0.966667	0.8	0.9	0.9	1	0.966667	0.966667	0.833333	0.866667	0.866667	0.9	1	0.933333	1	0.9	0.8	0.9	0.9	1	0.866667	0.966667	0.866667	0.833333	0.9	0.9	1	1	0.966667	0	0.866667	0.8	0.9	0.9	1	0.966667	0.966667	0.1	0.866667	0.866667	0.866667	0.9
	1.4	0.866667	0.933333	0.833333	0.9	1	1	0.966667	0.966667	0.833333	0.9	0.9	1	0.966667	0.966667	0.833333	0.866667	0.866667	0.9	1	0.933333	1	0.9	0.833333	0.9	0.9	1	0.866667	0.966667	0.866667	0.833333	0.9	0.9	1	1	0.966667	0	0.866667	0.8	0.933333	0.9	1	0.966667	0.966667	0.1	0.866667	0.9	0.866667	0.9
	1.42	0.9	0.933333	0.833333	0.9	1	1	0.966667	0.966667	0.866667	0.966667	0.9	1	1	1	0.833333	0.9	0.866667	0.9	1	0.933333	1	0.9	0.866667	0.9	0.9	1	0.933333	0.966667	0.866667	0.833333	0.9	0.9	1	1	0.966667	0	0.866667	0.833333	0.933333	0.9	1	0.966667	0.966667	0.1	0.866667	0.9	0.866667	0.9
	1.44	0.9	0.933333	0.866667	0.9	1	1	0.966667	0.966667	0.866667	0.966667	0.9	1	1	1	0.833333	0.9	0.9	0.9	1	0.933333	1	0.9	0.866667	0.9	0.9	1	0.966667	0.966667	0.866667	0.833333	0.9	0.9	1	1	0.966667	0	0.866667	0.866667	0.933333	0.933333	1	0.966667	0.966667	0.1	0.866667	0.9	0.9	0.9
	1.46	0.9	0.966667	0.866667	0.9	1	1	0.966667	0.966667	0.866667	1	0.9	1	1	1	0.833333	0.9	0.933333	0.9	1	0.933333	1	0.9	0.9	0.9	0.966667	1	0.966667	0.966667	0.866667	0.833333	0.9	0.9	1	1	0.966667	0	0.866667	0.866667	0.933333	0.933333	1	0.966667	0.966667	0.1	0.9	0.9	0.9	0.9
	1.46	0.9	0.966667	0.866667	0.9	1	1	0.966667	0.966667	0.866667	1	0.9	1	1	1	0.833333	0.9	0.933333	0.9	1	0.933333	1	0.9	0.9	0.9	0.966667	1	0.966667	0.966667	0.866667	0.833333	0.9	0.9	1	1	0.966667	0	0.866667	0.866667	0.933333	0.933333	1	0.966667	0.966667	0.1	0.9	0.9	0.9	0.9
	1.5	0.933333	0.966667	0.9	0.9	1	1	0.966667	0.966667	0.9	1	0.9	1	1	1	0.833333	0.933333	0.933333	0.9	1	0.966667	1	0.9	0.9	0.9	0.966667	1	1	0.966667	0.9	0.833333	0.933333	0.9	1	1	1	0.0333333	0.933333	0.9	1	0.966667	1	0.966667	1	0.2	0.9	0.9	0.9	0.9
	1.6	0.933333	0.966667	0.966667	0.9	1	1	0.966667	1	0.9	1	1	1	1	1	0.933333	0.966667	0.966667	1	1	0.966667	1	0.9	0.966667	0.933333	0.966667	1	1	1	0.966667	0.9	0.966667	0.933333	1	1	1	0.133333	0.966667	0.933333	1	0.966667	1	0.966667	1	0.366667	0.966667	0.933333	0.9	0.933333
	1.7	0.933333	0.966667	1	0.966667	1	1	1	1	0.933333	1	1	1	1	1	0.966667	1	1	1	1	0.966667	1	0.933333	1	0.933333	0.966667	1	1	1	1	0.933333	1	0.933333	1	1	1	0.3	1	0.966667	1	1	1	1	1	0.5	0.966667	0.933333	0.933333	0.966667
	1.8	0.933333	1	1	0.966667	1	1	1	1	0.933333	1	1	1	1	1	0.966667	1	1	1	1	1	1	0.933333	1	1	0.966667	1	1	1	1	0.966667	1	0.933333	1	1	1	0.533333	1	1	1	1	1	1	1	0.6	1	1	0.966667	0.966667
	1.9	0.966667	1	1	0.966667	1	1	1	1	0.966667	1	1	1	1	1	0.966667	1	1	1	1	1	1	0.933333	1	1	0.966667	1	1	1	1	0.966667	1	1	1	1	1	0.666667	1	1	1	1	1	1	1	0.733333	1	1	0.966667	0.966667
	2	0.966667	1	1	0.966667	1	1	1	1	0.966667	1	1	1	1	1	0.966667	1	1	1	1	1	1	1	1	1	0.966667	1	1	1	1	0.966667	1	1	1	1	1	0.733333	1	1	1	1	1	1	1	0.866667	1	1	1	1
	2.1	0.966667	1	1	0.966667	1	1	1	1	0.966667	1	1	1	1	1	0.966667	1	1	1	1	1	1	1	1	1	0.966667	1	1	1	1	0.966667	1	1	1	1	1	0.833333	1	1	1	1	1	1	1	0.933333	1	1	1	1
	2.2	0.966667	1	1	0.966667	1	1	1	1	1	1	1	1	1	1	0.966667	1	1	1	1	1	1	1	1	1	0.966667	1	1	1	1	0.966667	1	1	1	1	1	0.9	1	1	1	1	1	1	1	0.966667	1	1	1	1
	2.3	1	1	1	0.966667	1	1	1	1	1	1	1	1	1	1	0.966667	1	1	1	1	1	1	1	1	1	0.966667	1	1	1	1	0.966667	1	1	1	1	1	0.966667	1	1	1	1	1	1	1	1	1	1	1	1
	2.4	1	1	1	0.966667	1	1	1	1	1	1	1	1	1	1	0.966667	1	1	1	1	1	1	1	1	1	1	1	1	1	1	1	1	1	1	1	1	1	1	1	1	1	1	1	1	1	1	1	1	1
	2.5	1	1	1	0.966667	1	1	1	1	1	1	1	1	1	1	0.966667	1	1	1	1	1	1	1	1	1	1	1	1	1	1	1	1	1	1	1	1	1	1	1	1	1	1	1	1	1	1	1	1	1
	2.6	1	1	1	0.966667	1	1	1	1	1	1	1	1	1	1	0.966667	1	1	1	1	1	1	1	1	1	1	1	1	1	1	1	1	1	1	1	1	1	1	1	1	1	1	1	1	1	1	1	1	1
	2.7	1	1	1	1	1	1	1	1	1	1	1	1	1	1	0.966667	1	1	1	1	1	1	1	1	1	1	1	1	1	1	1	1	1	1	1	1	1	1	1	1	1	1	1	1	1	1	1	1	1
	2.8	1	1	1	1	1	1	1	1	1	1	1	1	1	1	1	1	1	1	1	1	1	1	1	1	1	1	1	1	1	1	1	1	1	1	1	1	1	1	1	1	1	1	1	1	1	1	1	1
[truncated: 37 more columns]

## Sheet: Deg_Cmax
	No	BF_MaxCap_MinSLAv	BF_MinCap_MinSLAv	BF_MinSLAv_MinSLAv	BF_MinTask_MinSLAv	BF_MaxCap_MinTask	BF_MinCap_MinTask	BF_MinSLAv_MinTask	FF_MaxCap_MinSLAv	FF_MinCap_MinSLAv	FF_MinSLAv_MinSLAv	FF_MinTask_MinSLAv	FF_MaxCap_MinTask	FF_MinCap_MinTask	FF_MinSLAv_MinTask	MaxSLAv_MaxCap_MinSLAv	MaxSLAv_MinCap_MinSLAv	MaxSLAv_MinSLAv_MinSLAv	MaxSLAv_MinTask_MinSLAv	MaxSLAv_MaxCap_MinTask	MaxSLAv_MinCap_MinTask	MaxSLAv_MinSLAv_MinTask	MinAW_MaxCap_MinSLAv	MinAW_MinCap_MinSLAv	MinAW_MinSLAv_MinSLAv	MinAW_MinTask_MinSLAv	MinAW_MaxCap_MinTask	MinAW_MinCap_MinTask	MinAW_MinSLAv_MinTask	MinSLAv_MaxCap_MinSLAv	MinSLAv_MinCap_MinSLAv	MinSLAv_MinSLAv_MinSLAv	MinSLAv_MinTask_MinSLAv	MinSLAv_MaxCap_MinTask	MinSLAv_MinCap_MinTask	MinSLAv_MinSLAv_MinTask	Rand	Rand_MaxCap_MinSLAv	Rand_MinCap_MinSLAv	Rand_MinSLAv_MinSLAv	Rand_MinTask_MinSLAv	Rand_MaxCap_MinTask	Rand_MinCap_MinTask	Rand_MinSLAv_MinTask	RR	WFit_MaxCap_MinSLAv	WFit_MinCap_MinSLAv	WFit_MinSLAv_MinSLAv	WFit_MinTask_MinSLAv
	1	0.332223	0.12189	0.39365	0.352682	0.0818223	0.330885	0.613255	0.525866	0.340422	0.198923	0.506165	0.16124	0.270523	0.412314	0.601629	0.297607	0.335158	0.291321	0	0.476516	0.291092	0.285437	0.253211	0.74825	1.31297	0.140758	0.405013	0.266034	0.640745	0.60711	0.202017	0.271393	0.247192	0.268284	0.292788	0.568262	0.317064	0.616477	0.287616	0.272962	0.246126	0.615476	0.471446	0.330701	0.731205	0.148784	0.277508	0.60744
	2	0.0141688	0.0234096	0.0156375	0.0333491	0.0304465	0.0188941	0.206357	0.0105665	0.0200186	0.0145441	0.0283551	0.0224647	0.0382375	0.213072	0.077113	0.0240718	0.0167363	0.0287002	0.0759801	0.028011	0.195643	0.0105885	0.0282746	0.0401579	0.0458972	0.0212415	0.0393805	0.022529	0.0299551	0.0384936	0.0203361	0.0728557	0.0793496	0.0390138	0.0261785	0.718595	0.0449493	0.0350981	0.0359846	0.0616607	0.0184965	0.0281659	0.0238147	0.765179	0.0230566	0.197071	0.0323786	0.0768446
	3	0.0052373	0.0102686	0.0083797	0.00275464	0.0052373	0.0102686	0.0083797	2.30789e-05	0.00862971	0.00107409	0.00239812	2.30789e-05	0.00862971	0.00107409	0.000642337	0.00871306	0.00107409	0.000162018	0.000642337	0.00871306	0.00107409	0.000890025	0.00898157	0.007551	0.00772923	0.000886475	0.00898157	0.007551	0.00220371	0.00871306	0.00107408	0.00239812	0.000352943	0.00862971	0.000591417	0.607163	0.0028669	0.00992604	0.00361114	0.00229748	0.0028669	0.00992604	0.00361114	0.963373	0.00653475	0.00611116	0.00399421	0.00520949
	4	0.41058	0.441036	0.310256	0.205078	0.129284	0.133605	0.157327	0.250337	0.383844	0.203886	0.378224	0.16495	0.116017	0.0140308	0.598866	0.234126	0.538454	0.317249	0.0879392	0.221899	0.104742	0.101263	0.607323	0.116821	0.242376	0.0281712	0.091895	0.176244	0.593592	0.535346	0.508968	0.58683	0.235825	0.378714	0.368484	0.670265	0.480039	0.413234	0.241715	0.347147	0.0849092	0.106266	0.0654403	0.344122	0.234453	0.18099	0.300403	0.122468
	5	0.137213	0.178095	0.131451	0.030436	0.137213	0.178095	0.131451	0.0276777	0.121133	0.105643	0.221076	0.0272472	0.121133	0.105643	0.0151341	0.0838207	0.032378	0.0327496	0.0151341	0.0838208	0.0321186	0.0646335	0.221077	0.147344	0.0389642	0.0653663	0.221077	0.147344	0.0200402	0.078213	0.0526877	0.205446	0.08435	0.0523359	0.151585	0.792641	0.0651231	0.221076	0.0421823	0.213959	0.0651231	0.221076	0.0421823	0.702146	0.131615	0.0561064	0.199334	0.108008
	6	0.0835772	0.197666	0.197963	0.198803	0.0799383	0.197666	0.197963	0.126372	0.158808	0.158771	0.198789	0.126372	0.158807	0.158771	0.079399	0.158807	0.158771	0.185827	0.0793989	0.158807	0.158771	0.150165	0.158849	0.198789	0.158816	0.0624286	0.158849	0.198789	0.0555952	0.190316	0.219926	0.198789	0.126339	0.247852	0.158771	0.782394	0.174019	0.197982	0.130821	0.158779	0.174019	0.197982	0.130822	1.11488	0.0794001	0.218402	0.129227	0.158849
	7	0.0500942	0.306745	0.114604	0.240582	0.0648907	0.306745	0.114605	0.193811	0.320668	0.307413	0.112684	0.193811	0.320668	0.307413	0.0116454	0.315984	0.205334	0.13512	0.038423	0.315984	0.205334	0.236202	0.235671	0.308205	0.312878	0.19952	0.235671	0.308205	0.0668454	0.127099	0.13975	0.171014	0.0653444	0.320768	0.308527	0.483798	0.235671	0.236329	0.115157	0.113293	0.235671	0.236329	0.115157	1.02658	0.0958382	0.17264	0.306745	0.166393
	8	0.147442	0.358115	0.147444	0.147444	0.147442	0.358115	0.147444	0.117848	0.21958	0.0849603	0.157759	0.117848	0.21958	0.0849603	0.104115	0.196303	0.112398	0.168085	0.104115	0.196303	0.112398	0.14451	0.415905	0.251808	0.251808	0.14451	0.415905	0.251808	0.206188	0.359047	0.0715956	0.0650226	0.117848	0.358435	0.192641	0.753313	0.167416	0.262612	0.245739	0.245739	0.167416	0.262612	0.245739	0.631391	0.14451	0.715348	0.0993864	0.229575
	9	0.240864	0.333399	0.211662	0.197008	0.240864	0.246568	0.173921	0.240864	0.321905	0.104326	0.196099	0.240864	0.321905	0.118279	0.240864	0.232391	0.225567	0.197008	0.240864	0.212768	0.225567	0.226894	0.2218	0.176072	0.198424	0.165067	0.2218	0.191677	0.240864	0.246751	0.173921	0.197967	0.0187997	0.267815	0.128106	1.20557	0.240762	0.233823	0.220135	0.223714	0.00434209	0.356195	0.225567	0.855463	0.240864	0.197008	0.225567	0.22723
	10	0.118196	0.356119	0.111816	0.111601	0.111521	0.0929698	0.0982565	0.0828843	0.106612	0.111644	0.13476	0.087683	0.106627	0.10491	0.0808828	0.271884	0.14562	0.0974436	0.0847887	0.263489	0.10491	0.0731961	0.0994022	0.0659469	0.108649	0.0307229	0.0991736	0.156896	0.113314	0.143733	0.0426877	0.104027	0.0773655	0.106619	0.10491	0.781741	0.127743	0.17689	0.103921	0.110532	0.0789315	0.0912753	0.0976068	0.926262	0.0806969	0.105364	0.0408641	0.104044
	11	0.152823	0.247215	0.426944	0.195776	0.148414	0.0537813	0.0769647	0.331976	0.286474	0.130617	0.143871	0.0696669	0.185046	0.0597723	0.349158	0.272913	0.190135	0.180234	0.0662605	0.140891	0.108214	0.209547	0.542512	0.148036	0.166172	0.0850382	0.471396	0.00464149	0.375821	0.362005	0.0846375	0.135862	0.130456	0.0894305	0.078834	0.827507	0.488214	0.0743232	0.385006	0.0738401	0.0949871	0.0448004	0.120345	0.831267	0.319421	0.195656	0.032566	0.275222
	12	0.489276	0.22632	0.484896	0.663264	0.156586	0.305729	0.147986	0.24505	0.152632	0.262728	0.535904	0.206138	0.0838748	0.107226	0.17892	0.414359	0.266505	0.202867	0.0963974	0.292151	0.107226	0.185402	0.281329	0.517835	0.310316	0.100267	0.117215	0.0323707	0.475608	0.320573	0.666291	0.289327	0.177621	0.342997	0.135488	0.712918	0.204357	0.474672	0.244104	0.498149	0.119492	0.229576	0.249963	0.587079	0.315586	0.385327	0.326225	0.327108
	13	0.826218	0.230927	0.548898	0.677033	0.231597	0.168348	0.235147	0.377475	0.817772	0.345068	0.367748	0.103023	0.220557	0.236738	1.71082	0.512874	0.633689	0.574779	0.155509	0.123581	0.0899843	0.903598	0.572299	0.700294	0.45243	0.0433606	0.211991	0.556857	0.370777	0.799659	0.469872	0.867054	0.00614951	0.0204022	0.00485774	0.624065	0.617043	0.76538	0.488148	0.197739	0.208969	0.349306	0.341812	0.660697	0.523552	0.744617	0.979387	0.964747
	14	0.016861	0.124349	0.12713	0.12713	0.016861	0.124349	0.12713	0.129502	0.131557	0.128521	0.129427	0.129502	0.131557	0.128521	0.127374	0.251752	0.128521	0.127374	0.127374	0.251752	0.128521	0.0522236	0.254165	0.250306	0.140738	0.128302	0.254165	0.250306	0.0134185	0.128853	0.132091	0.131733	0.016861	0.134827	0.129611	1.05503	0.129449	0.129053	0.120762	0.250683	0.129449	0.129053	0.120762	0.69414	0.131907	0.230733	0.190439	0.257498
	15	0.10719	0.191785	0.0781605	0.058747	0.10719	0.191785	0.0781605	0.0250183	0.135712	0.0581385	0.0619044	0.0427173	0.135712	0.0581385	0.0722438	0.117926	0.101172	0.0586856	0.0287787	0.117926	0.101172	0.116797	0.127129	0.101205	0.0587205	0.116807	0.127129	0.101205	0.0255984	0.117934	0.103597	0.0586856	0.112453	0.117926	0.131861	0.600977	0.104163	0.117844	0.208211	0.10652	0.0719336	0.117844	0.208211	0.492813	0.00627016	0.117926	0.117248	0.0625488
	16	0.0218335	0.123908	0.129805	0.00617481	0.0218335	0.123908	0.129805	0.0557644	0.0395709	0.0519218	0.0496463	0.0557644	0.0395709	0.0519218	0.0188798	0.0382608	0.0519218	0.049563	0.0188798	0.0382608	0.0519218	0.0560492	0.183241	0.144596	0.0810714	0.0542656	0.183241	0.144596	0.015889	0.103077	0.129805	0.00868526	0.0555793	0.0378904	0.123908	0.708894	0.055967	0.0966591	0.0121205	0.00221527	0.055967	0.0966591	0.0121205	1.20422	0.194637	0.0861443	0.123931	0.0761054
	17	0.0971817	0.128034	0.282079	0.205197	0.0971817	0.128034	0.282079	0.0801119	0.160282	0.105904	0.0726111	0.0801119	0.160282	0.105904	0.00988545	0.160282	0.105663	0.0274111	0.00988545	0.160282	0.105663	0.079973	0.240484	0.0186842	0.158596	0.0341565	0.240484	0.0186842	0.0234053	0.0344355	0.130167	0.0606168	0.0971815	0.160653	0.0128404	0.986709	0.0191761	0.205197	0.205197	0.121163	0.0191761	0.205197	0.205197	0.564915	0.0545619	0.160146	0.0523987	0.065459
	18	0.0161756	0.0235928	0.00469445	0.030344	0.0161756	0.0235928	0.00469445	0.0625851	0.0375848	0.100279	0.032844	0.0625851	0.0375848	0.100279	0.0616615	0.0289829	0.10028	0.031094	0.0616615	0.0289829	0.10028	0.0488951	0.0437597	0.0465629	0.0655173	0.0476763	0.0437597	0.0465629	0.00806116	0.100279	0.100279	0.100023	0.0432527	0.0287653	0.100279	0.835287	0.0178717	0.0291391	0.0109839	0.0331218	0.0178717	0.0291391	0.0109839	0.853226	0.0388186	0.0699498	0.0427122	0.0800146
	19	0.0630163	0.220801	0.231274	0.109565	0.212639	0.0713132	0.076096	0.178351	0.0906133	0.22629	0.31243	0.215133	0.155566	0.288233	0.162498	0.242585	0.206212	0.00650699	0.234369	0.0871456	0.122002	0.0999984	0.182723	0.130813	0.241223	0.221013	0.112444	0.288074	0.128478	0.254898	0.2755	0.242106	0.222215	0.0562532	0.0250925	1.35905	0.0717274	0.245308	0.281472	0.0784827	0.150336	0.187806	0.147015	0.541942	0.233791	0.170125	0.12818	0.17386
	20	0.239608	0.230953	0.202629	0.182102	0.173125	0.17818	0.153871	0.215553	0.180615	0.152616	0.195131	0.214794	0.17861	0.254713	0.156626	0.192032	0.222232	0.179005	0.172081	0.179716	0.179135	0.180421	0.442439	0.178214	0.176401	0	0.429492	0.21422	0.17389	0.191159	0.270242	0.181536	0.173842	0.176612	0.0387885	0.96061	0.179832	0.353129	0.13311	0.176166	0.21443	0.353129	0.0927554	0.988585	0.172576	0.179306	0.378747	0.177994
	21	0.351879	0.341118	0.237297	0.163755	0.0999901	0.16816	0.112157	0.233375	0.48816	0.281211	0.555688	0.0717215	0.154072	0.0826417	0.543849	0.355609	0.239044	0.506364	0.0603336	0.137689	0.15968	0.664403	0.397899	0.347782	0.27241	0.101597	0.0599681	0.147774	0.259925	0.557218	0.243041	0.153753	0.0754027	0.0469008	0.226316	1.27199	0.22369	0.57853	0.109539	0.625146	0.118495	0.303497	0.179585	0.535932	0.188593	0.304571	0.29238	0.170011
	22	0.209366	0.350807	0.621958	0.233986	0.197352	0.396706	0.276542	0.223225	0.664816	0.443104	0.213629	0.0616052	0.354856	0.301181	0.370308	0.479681	0.424823	0.198716	0.198132	0.77147	0.182243	0.132034	0.282613	0.349789	0.16254	0.210647	0.238293	0.348284	0.14274	0.308065	0.137254	0.208436	0.121262	0.284113	0.495773	0.506136	0.231869	0.432517	0.341167	0.119141	0.00645704	0.140572	0.324678	0.350919	0.454231	0.221751	0.776051	0.228644
	23	0.0831721	0.0224701	0.0216622	0.0282977	0.0831721	0.0224701	0.0216622	0.00550925	0.061062	0.061062	0.0715621	0.00550925	0.061062	0.061062	0.0720898	0.061062	0.061062	0.0715621	0.0720898	0.061062	0.061062	0.0831721	0.219043	0.218551	0.21855	0.0623791	0.219043	0.218551	0.0227919	0.0943285	0.0232757	0.0715621	0.00920603	0.061062	0.0715621	0.669798	0.0831721	0.0384298	0.145551	0.145551	0.0831721	0.0384298	0.145551	0.824835	0.0424309	0.0715621	0.0715621	0.0715621
	24	0.0633283	0.241222	0.14736	0.14736	0.0633283	0.241222	0.14736	0.149658	0.163327	0.042745	0.10355	0.149658	0.163327	0.042745	0.179228	0.163327	0.0499252	0.112524	0.179228	0.163327	0.0499252	0.180461	0.310402	0.213554	0.241415	0.159143	0.310402	0.213554	0.130093	0.1639	0.144894	0.107721	0.149658	0.237434	0.120111	1.10694	0.0981484	0.239202	0.239256	0.139302	0.0981484	0.239202	0.239256	0.560019	0.242892	0.281166	0.240505	0.300857
	25	0.0502954	0.201544	0.178223	0.0837994	0.0502954	0.201544	0.178223	0.100158	0.0884071	0.126705	0.166202	0.100158	0.0884071	0.126705	0.166202	0.207751	0.134327	0.166201	0.166202	0.207751	0.134327	0.073134	0.207751	0.246445	0.16025	0.119589	0.207751	0.246445	0.178137	0.207751	0.166201	0.0756026	0.100222	0.207751	0.178263	1.16704	0.150726	0.152487	0.178737	0.207751	0.150726	0.152487	0.178737	0.68386	0.130956	0.178832	0.214522	0.178804
	26	0.000388865	0.0325536	0.00311113	4.16517e-05	0.000388865	0.0325536	0.00311113	0.0235269	0.169823	0.00544888	0.175662	0.0235269	0.169823	0.00544888	0.0101459	0.0373096	0.118112	0.0115742	0.0101459	0.0373096	0.118112	0.0254875	0.0867142	0.0450467	0.0876849	0.0143925	0.0867142	0.0450467	0.00105303	0.00184721	0.0949477	0.189151	0.0236125	0.176241	0.026403	0.532584	0.000422237	0.17613	0.000760203	0.000760409	0.000422237	0.17613	0.000760203	0.46054	0.0585261	0.179512	0.0450468	0.154762
	27	0.0291869	0.244298	0.241984	0.2444	0.0291868	0.244298	0.241984	0.0276405	0.160609	0.193587	0.151222	0.0276405	0.160609	0.193587	0.0314893	0.0745783	0.180477	0.246547	0.0314893	0.0745783	0.180477	0.05707	0.306217	0.160333	0.270836	0.163726	0.306217	0.160333	0.0231252	0.0330999	0.0406422	0.0864886	0.0287864	0.248447	0.200944	0.894557	0.0254366	0.15387	0.0387232	0.0948266	0.0254366	0.15387	0.0387232	1.07536	0.106942	0.24424	0.122154	0.153938
	28	0.118413	0.268168	0.0850057	0.26943	0.174796	0.268168	0.145661	0.118893	0.268058	0.265178	0.266371	0.118893	0.268058	0.265077	0.114121	0.26933	0.265151	0.266371	0.114121	0.26933	0.265077	0.0849555	0.268895	0.160237	0.269085	0.131339	0.268895	0.160237	0.0841864	0.268168	0.262658	0.268298	0.0997498	0.26613	0.262877	1.07642	0.0845385	0.26346	0.262875	0.266417	0.144562	0.26346	0.262875	0.463625	0.0362121	0.269078	0.083993	0.268305
	29	0.161863	0.277728	0.214642	0.221273	0.311356	0.328901	0.198453	0.211394	0.404803	0.414201	0.247648	0.374562	0.404657	0.192706	0.216843	0.370191	0.238113	0.265863	0.152499	0.317422	0.21202	0.360041	0.331198	0.245214	0.244576	0.166895	0.331198	0.243873	0.359227	0.299564	0.279946	0.307905	0.308299	0.332632	0.2544	1.00067	0.307967	0.355769	0.269114	0.215558	0.159322	0.272217	0.237469	0.966371	0.374377	0.353146	0.422645	0.226174
	30	1.2291	0.702076	0.549962	1.63405	0.33889	0.220848	0.223965	0.287719	1.16017	0.408907	0.289814	0.2075	0.204203	0.247492	0.519021	0.612541	0.451156	0.589587	0.209012	0.19185	0.263199	0.901884	0.378916	0.379742	0.441251	0.219863	0.265633	0.22745	0.522759	1.35284	0.305244	0.812911	0.375649	0.257311	0.254676	0.835324	0.505678	0.186618	0.471898	0.420186	0.223484	0.249943	0.316867	0.72162	0.546311	0.576708	0.689604	0.503164
	Average	0.195559	0.22522	0.215353	0.226715	0.118634	0.178923	0.157	0.155291	0.255456	0.169847	0.202639	0.115424	0.167985	0.147685	0.229389	0.222902	0.198	0.17755	0.0963912	0.187293	0.138396	0.192977	0.263674	0.222139	0.229943	0.101304	0.212772	0.179871	0.176811	0.267816	0.183118	0.207773	0.112674	0.177741	0.153516	0.836542	0.181837	0.249039	0.185787	0.184094	0.105691	0.195254	0.161835	0.724069	0.198026	0.233944	0.231523	0.217428
[truncated: 38 more columns]
